# Supplementary figures and images for: Carboxymethylated Lycium barbarum seed dreg dietary fiber alleviates high fat diet-induced hyperlipidemia in mice via intestinal regulation
Source: Royal Society of Chemistry journal article supplement (doi:10.1039/d4fo02123a), 2024-01-01

Supplementary Material:

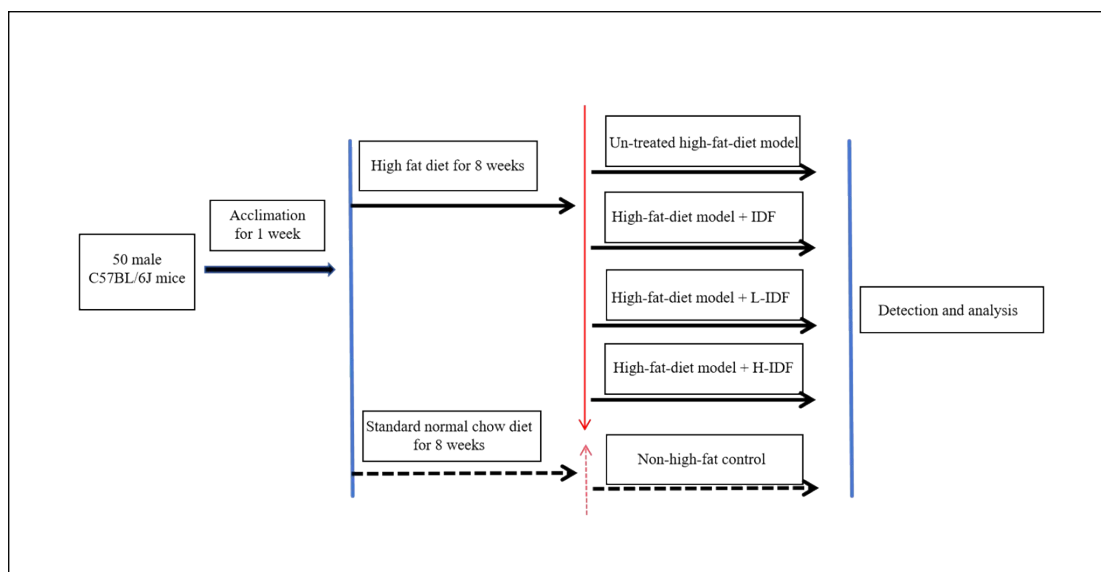

**Figure S1.** Experimental protocol and design.

Supplement: d4fo02123a1.pdf [file d4fo02123a1.pdf]
